# Supplementary material for: Pilot study of the productivity and Salmonella seroprevalence in pigs administered organic acids
Source: Frontiers journal article supplement (doi:10.3389/fvets.2023.1123137), 2023-03-03
Supplement: Table_1.docx [file Table_1.docx]

Supplementary Material

Productivity and *Salmonella* seroprevalence in pigs administered organic acids

Manuela Roldan-Henao1*, Anders Dalsgaard2, Nora Cardona-Castro3, Lina Restrepo-Rivera3, Luis Veloza-Angulo1 Lis Alban2,4

1 Department of Veterinary and Animal Sciences, CES University, Medellin, Colombia

2 Department of Veterinary and Animal Sciences, University of Copenhagen, Copenhagen, Denmark

3Instituto Colombiano de Medicina Tropical, CES University, Medellin, Colombia

4Department for Food Safety and Veterinary Issues, Danish Agriculture & Food Council, Copenhagen, Denmark

*** Correspondence:**

Manuela Roldan-Henao
maroldanh@uces.edu.co

# Supplementary Figures and Tables

Table S1. Composition of the feed given to the pigs during the study

| Type of pig | Component | Concentration |
| --- | --- | --- |
| Weanera | Protein | 20% |
| Fiber | 4% |
| Energy | 3300 Kcal |
| Growingb | Protein | 17% |
| Fiber | 5% |
| Energy | 3200 Kcal |
| Finisherc | Protein | 15% |
| Fiber | 6% |
| Energy | 3200 Kcal |

a Feed ingredient: maize, extruded soybeans, fish fluor and choline chloride

b Feed ingredients: maize, soybean fluor, extruded soybeans and choline chloride

c Feed ingredients: maize, soybean fluor and choline chloride
